# Supplementary material
Source: publisher site journal article supplement (https://www.dovepress.com/article/383862)
Supplement: Supplementary file 1 [file get_supplementary_file.php]

**Supplementary Information for**

**Combined self-assembled iRGD polymersomes for effective targeted siRNA anti-tumor therapy**

Dongying Li,a,b,1, Jiarun Li,a,b,1 Siwei Wang,a,b Wei Teng,b, * Qinmei Wang a,*

a Laboratory of Biomaterials, Key Laboratory on Assisted Circulation, Ministry of Health, Cardiovascular Division, First Affiliated Hospital, Sun Yat-sen University, Guangzhou, China

b Hospital of Stomatology, Guangdong Provincial Key Laboratory of Stomatology, Institute of Stomatological Research, Guanghua School of Stomatology, Sun Yat-sen University, Guangzhou, China

1 The first two authors contributed equally to this work.

* Corresponding authors:

Wei Teng

Email: [tengwei@mail.sysu.edu.cn](mailto:tengwei@mail.sysu.edu.cn)

Qinmei Wang

Email: [wangqinm@mail.sysu.edu.cn](mailto:wangqinm@mail.sysu.edu.cn)

**A**


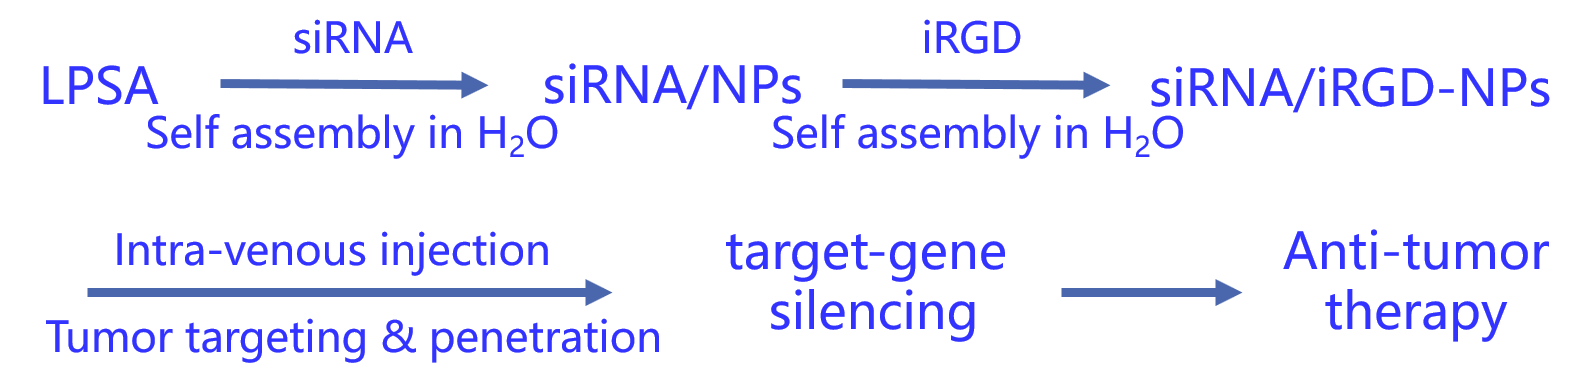

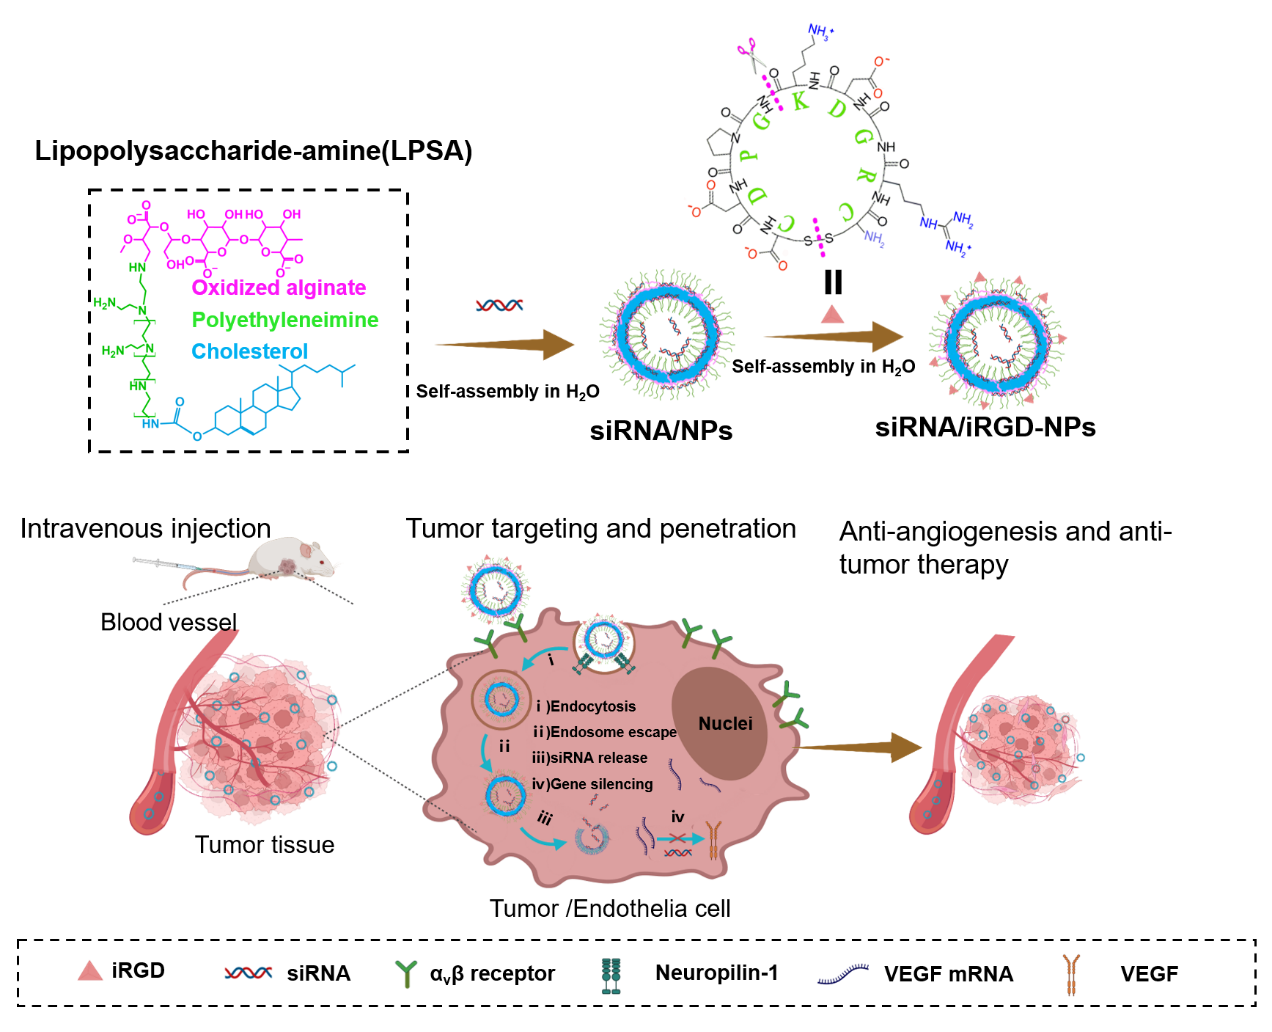


**B**

**Figure S1** (A)Flow chart for preparation of siRNA-loaded lipopolysaccharide-amine nanopolymersomes functionalized with iRGD (siRNA/iRGD-NPs) for anti-tumor therapy enhanced by iRGD-mediated tumor target and penetration. (B) Proposed scheme of preparation of siRNA-loaded lipopolysaccharide-amine nanopolymersomes functionalized with iRGD (siRNA/iRGD-NPs).

**Table S1** Primer sequences

| Gene | 5ʹ-3ʹ Sequence |
| --- | --- |
| VEGFR-2 (zebrafish) | Forward-GCUCAGCACACAGAAAGACdTdT |
| Reverse- dTdTGACUUUUGUUACAACACUU |
| VEGFR-2(mice) | Forward-CGGAGAAGAAUGUGGUUAAdTdT |
| Reverse-dTdTGCCUCUUCUUACACCAAUU |
| GAPDH | Forward-AAGAAGGTGGTGAAGCAGG |
| Reverse-GAAGGTGGAAGAGTGGGAGT |
| Cy5-labeled siRNA | Cat No. siT0000003S-1-5 (RiboBio, Guangzhou, China) |
|  |  |


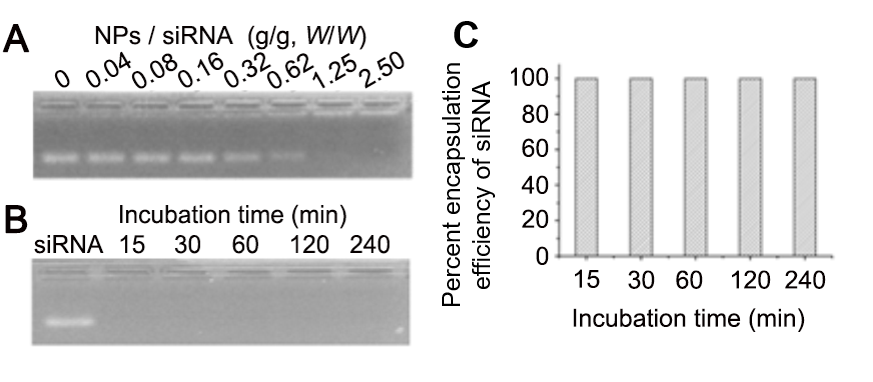


**Figure S2** Loading capacity of siRNA by LPSA nanopolymers (NPs). (A) Loading capacity of NPs to siRNA (analyzed by gel electrophoresis), where siRNA can be completely retarded by NPs at NPs/siRNA ≥ 1.25 g/g (weight ratio, *W*/*W*). (B,C) Effects of incubation time on loading of NPs to siRNA at NPs/siRNA = 1.25/1 (*W*/*W*), where 15 min of incubation time is enough for siRNA/NPs complexes formation when mixing equal volume of NPs and siRNA. Data in (B) and (C) were analyzed by gel electrophoresis and micro-BCA assay kit, respectively. These results suggest that siRNA can be quickly complexed by NPs at NPs/siRNA ≥ 1.25 g/g with 100% encapsulation efficiency.

**
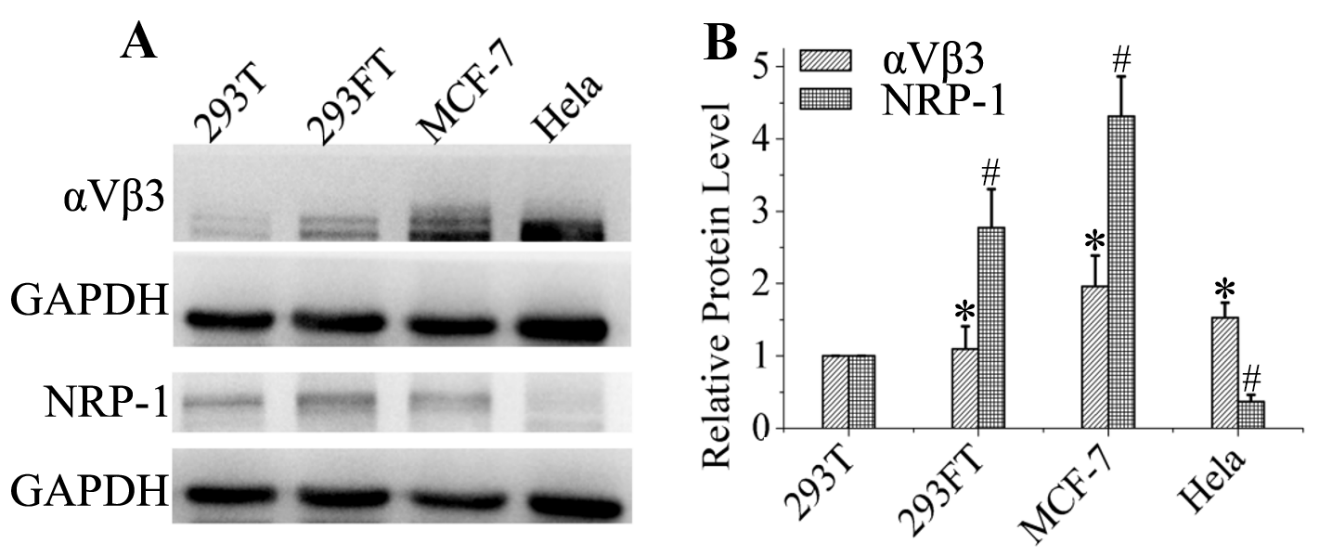
Figure S3** Tumor cell selection for iRGD target by analyzing receptor expression of αVβ3 integrin and NPR-1 in 393T, 293FT, MCF-7, and Hela cells. (A) WesternBlot analysis. (B) Relative protein level, where * OR #*P* < 0.05 vs 293T cells. Results show that MCF-7 expresses the maximum protein of αVβ3 and NRP-1. Thus, MCF-7 was chosen as model cell for siRNA-target delivery experiments in this study.


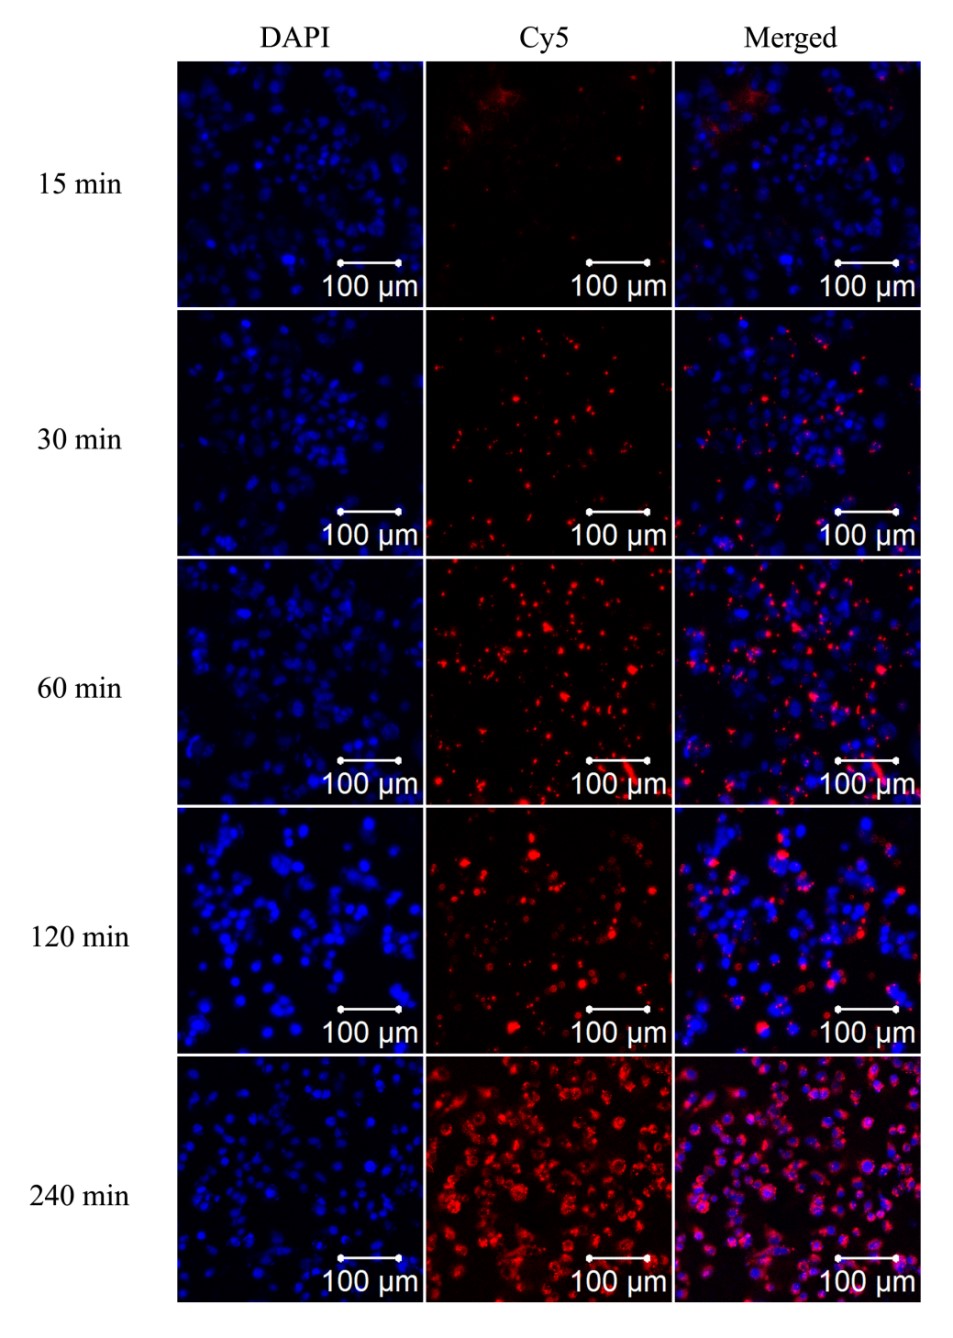
**Figure S4** Effects of incubation time on transfection efficiency of siRNA/iRGD-NPs in MCF-7. Images taken by laser confocal scanning microscope. Blue: cell nucleus stained by DAPI, Red: siRNA labeled by Cy5.


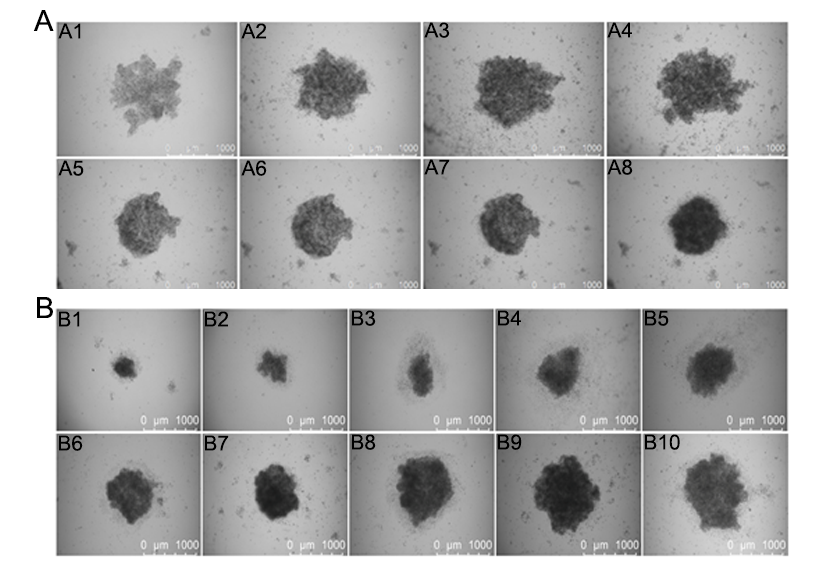
**Figure S5** MCF-7 spheroid preparation by hanging drop method. (A) Effects of culture time on inverted lids and on agar on the formation of tumor spheroids at 50k cells/hanging drop. A1-A4: culture on inverted lids for 1, 2, 3, and 4 days, respectively; A5-A8: culture on agar-coated plates for 1, 2, 3, and 4 days, respectively, after culture on inverted lids for 2 days. (B) Effects of cell number in hanging drops on the formation of tumor spheroids, where the cell number for B1-B10 was 5k, 10k, 15k, 20k, 25k, 30k, 35k, 40k, 45k, and 50k, respectively, and the culture time on inverted lids and on agar are 48 and 96 hours, respectively.


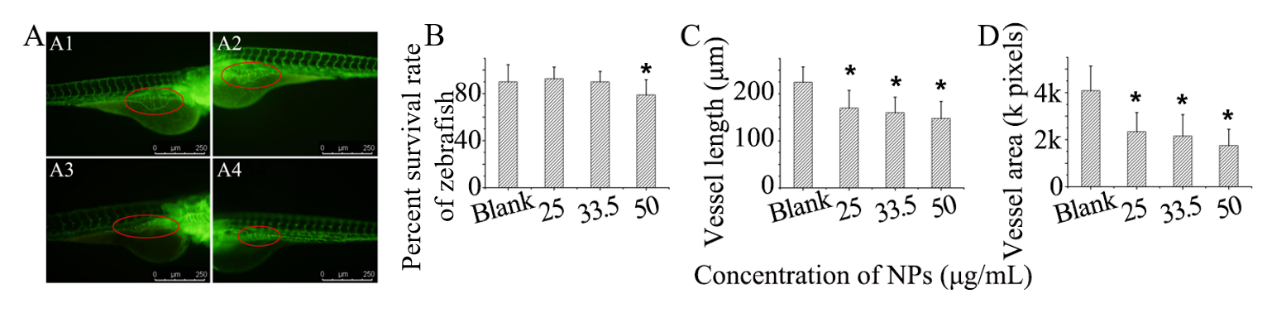


**Figure S6** The optimal concentration of NPs for *in vivo* siVEGF delivery in Zebrafish. Images (A), Survival rate (B), and vessel length (C) and area (D) of zebrafish treated by siRNA/NPs with different NPs concentration and 50 nM siRNA in culture media. **P* < 0.05 vs blank.
